# Supplementary material
Source: PubMed Central journal article supplement (PMC6865816)
Supplement: HBM-40-3243-s001.pdf [file HBM-40-3243-s001.pdf]

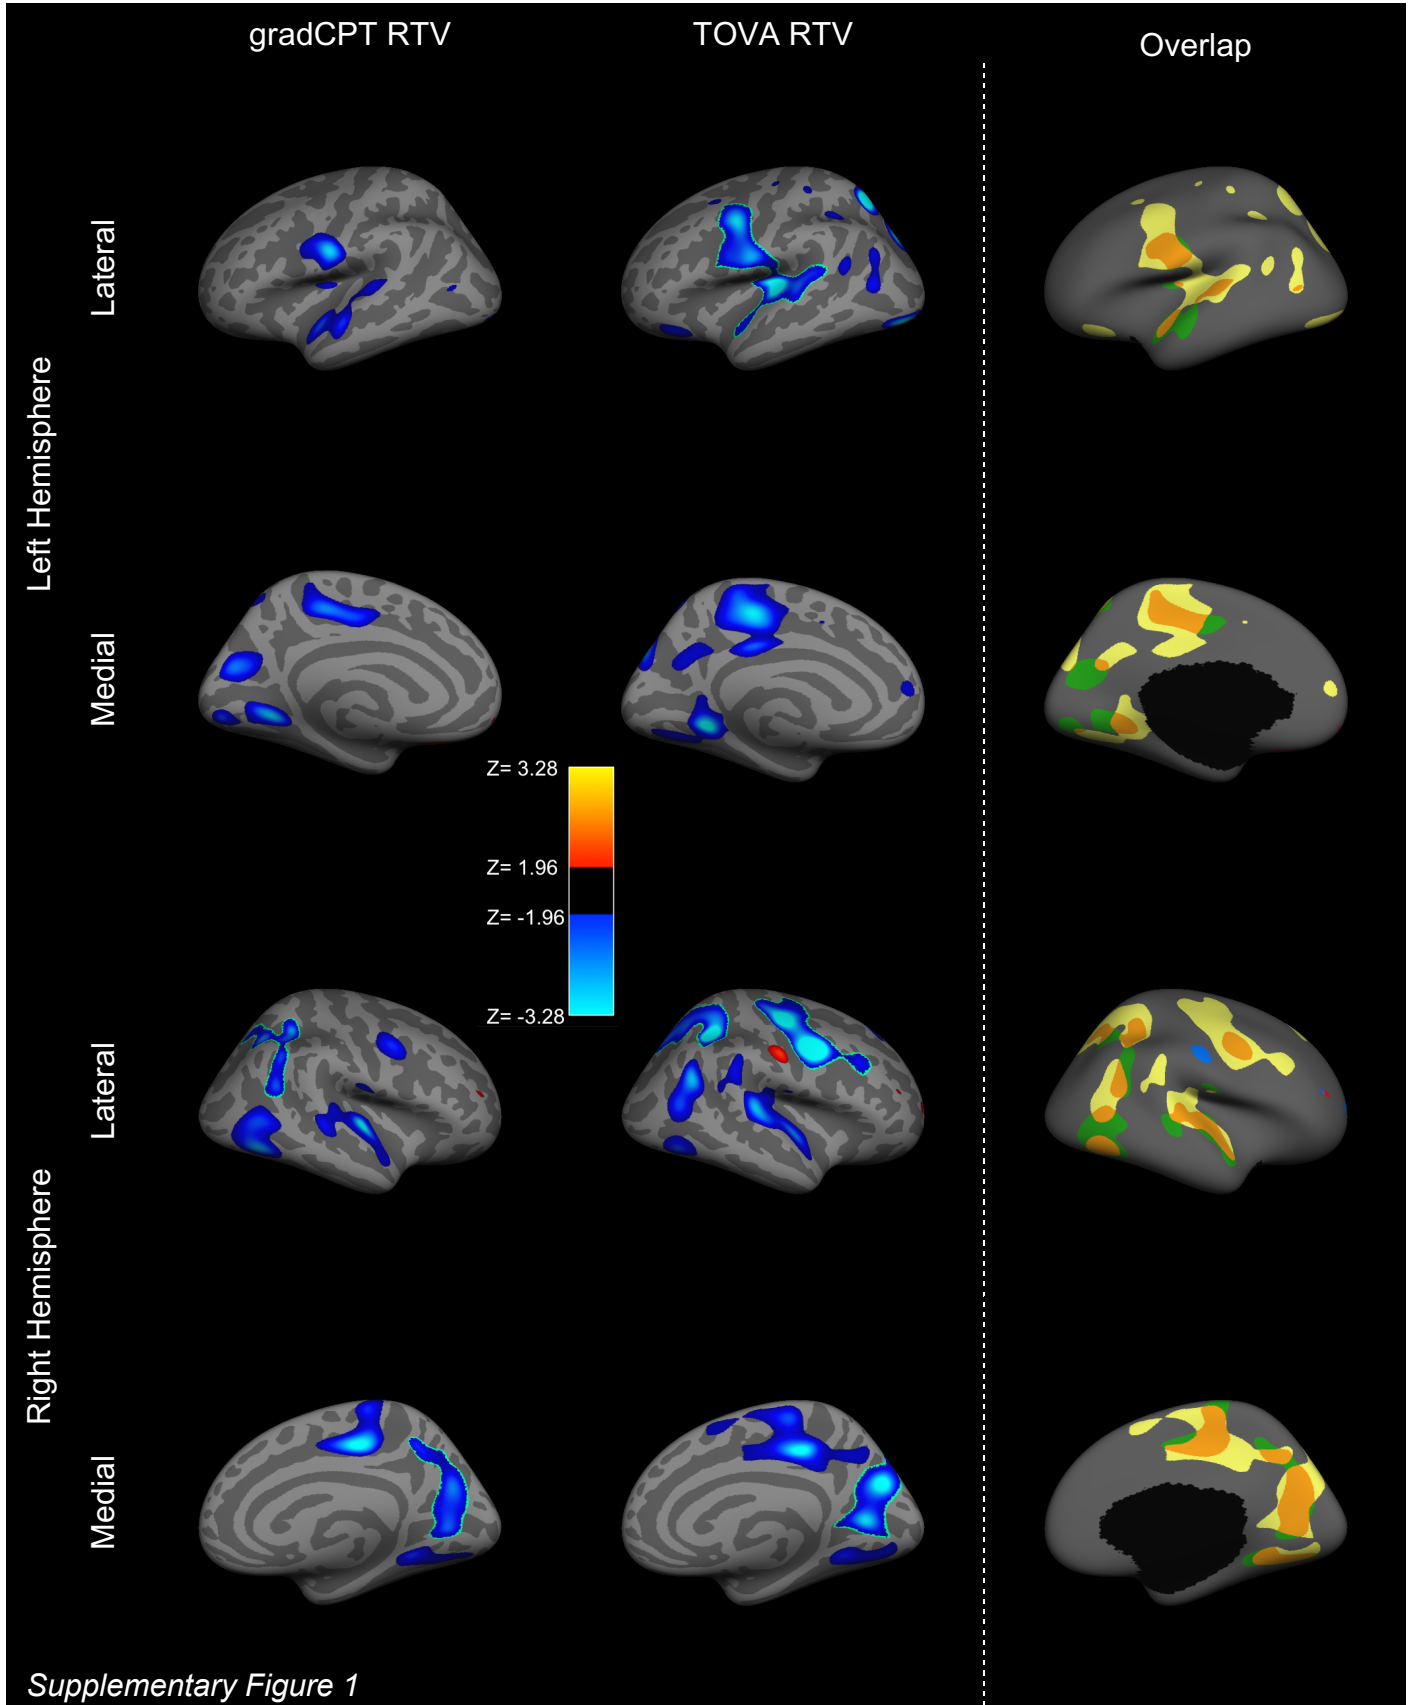

Supplementary Figure 1

*Supplementary Figure 1.* Whole brain vertex-wise analysis of the association between cortical thickness and sustained attention variability, as measured by reaction time variability (RTV) on the gradCPT and TOVA. Left and middle panel: Warm colors indicate positive correlations ( $p < .05$ ), cold colors indicate negative correlations ( $p < .05$ ). A green outline indicates a region that survives cluster correction ( $p < .05$ ). Right panel: The overlap (purple) between the significant positively correlated regions (nominal  $p < .05$ ) of gradCPT (red = positive) and the TOVA (blue = positive). The overlap (orange) between the significant negatively correlated regions (nominal  $p < .05$ ) of gradCPT (green = negative) and the TOVA (yellow = negative).

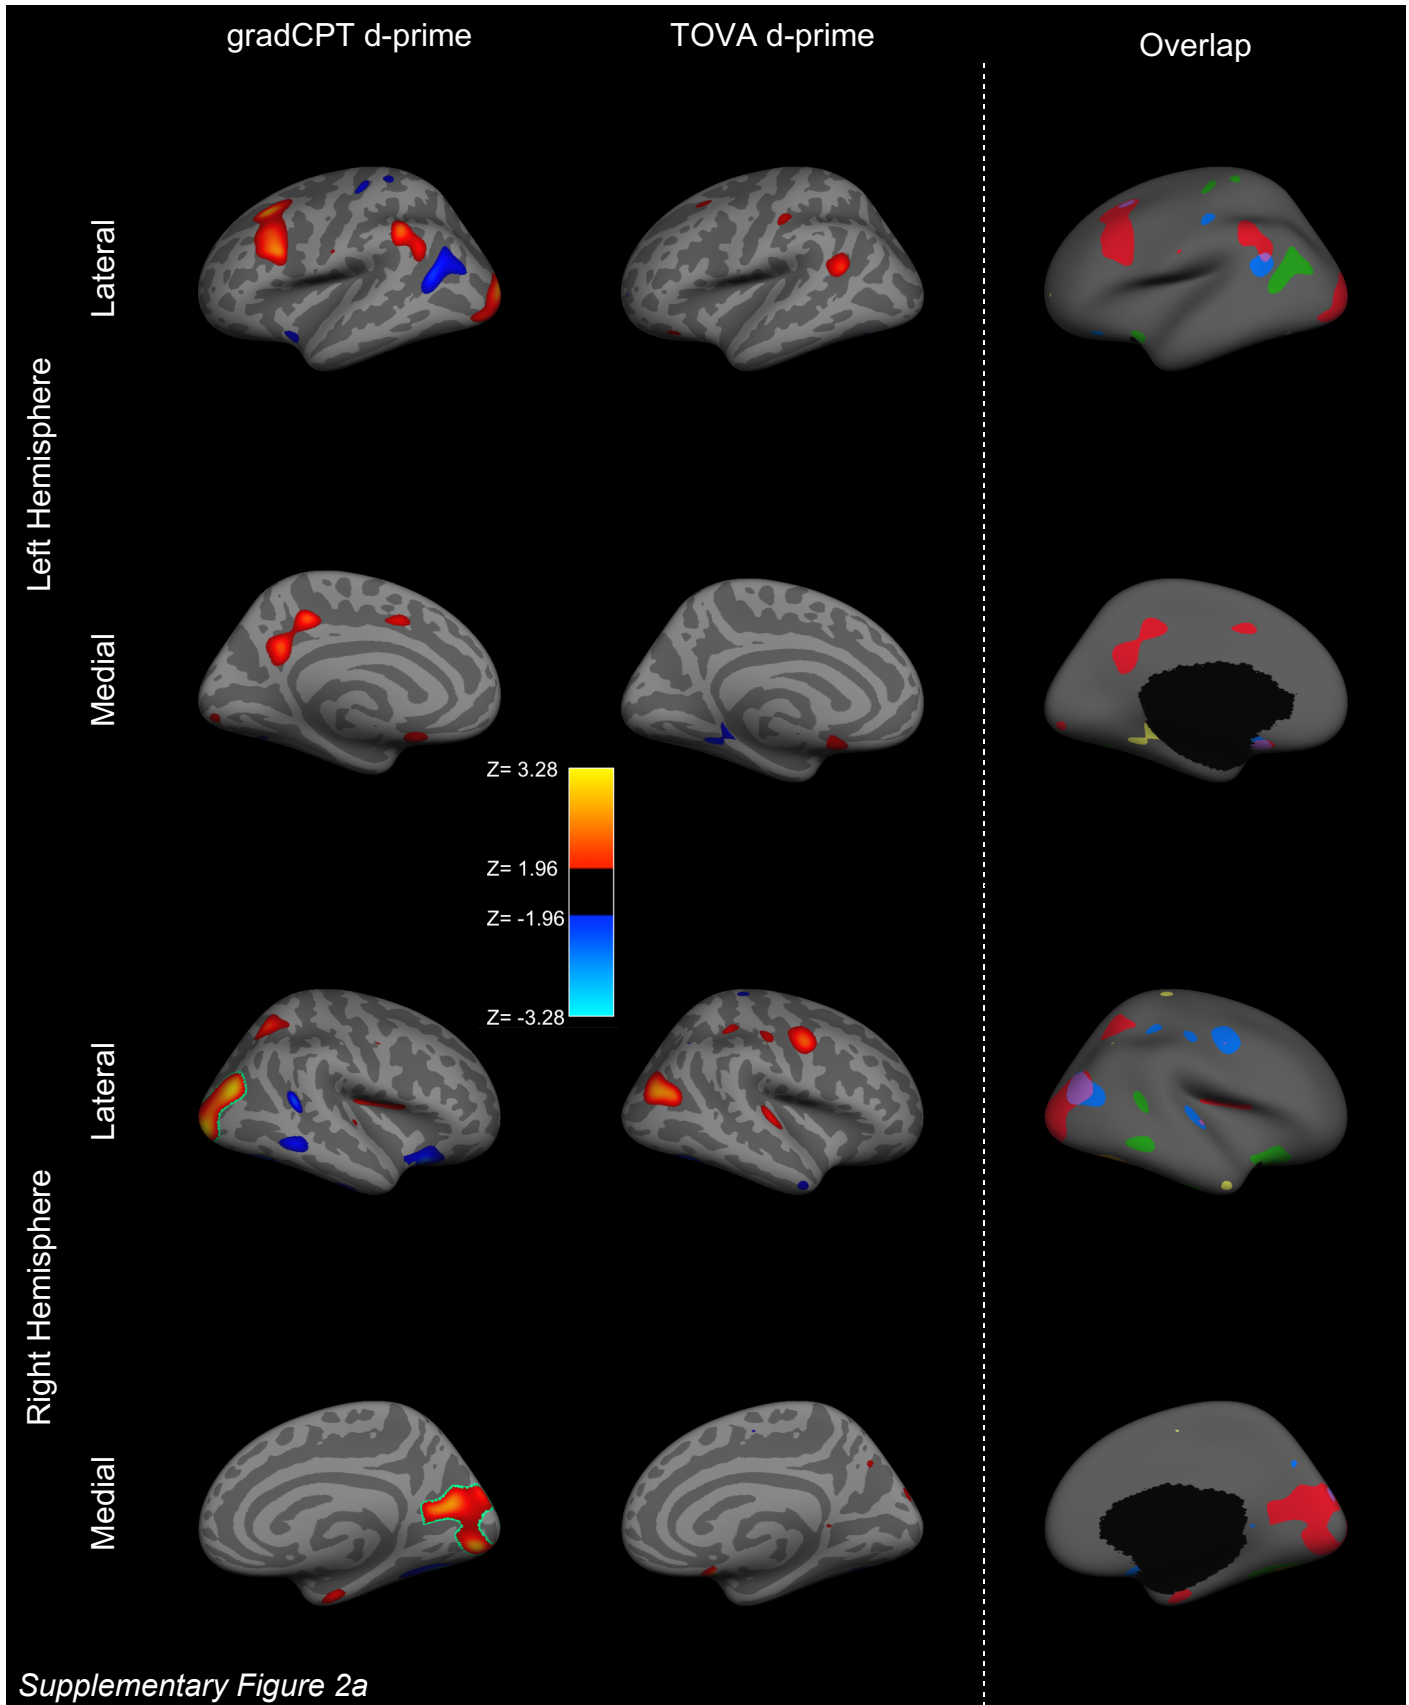

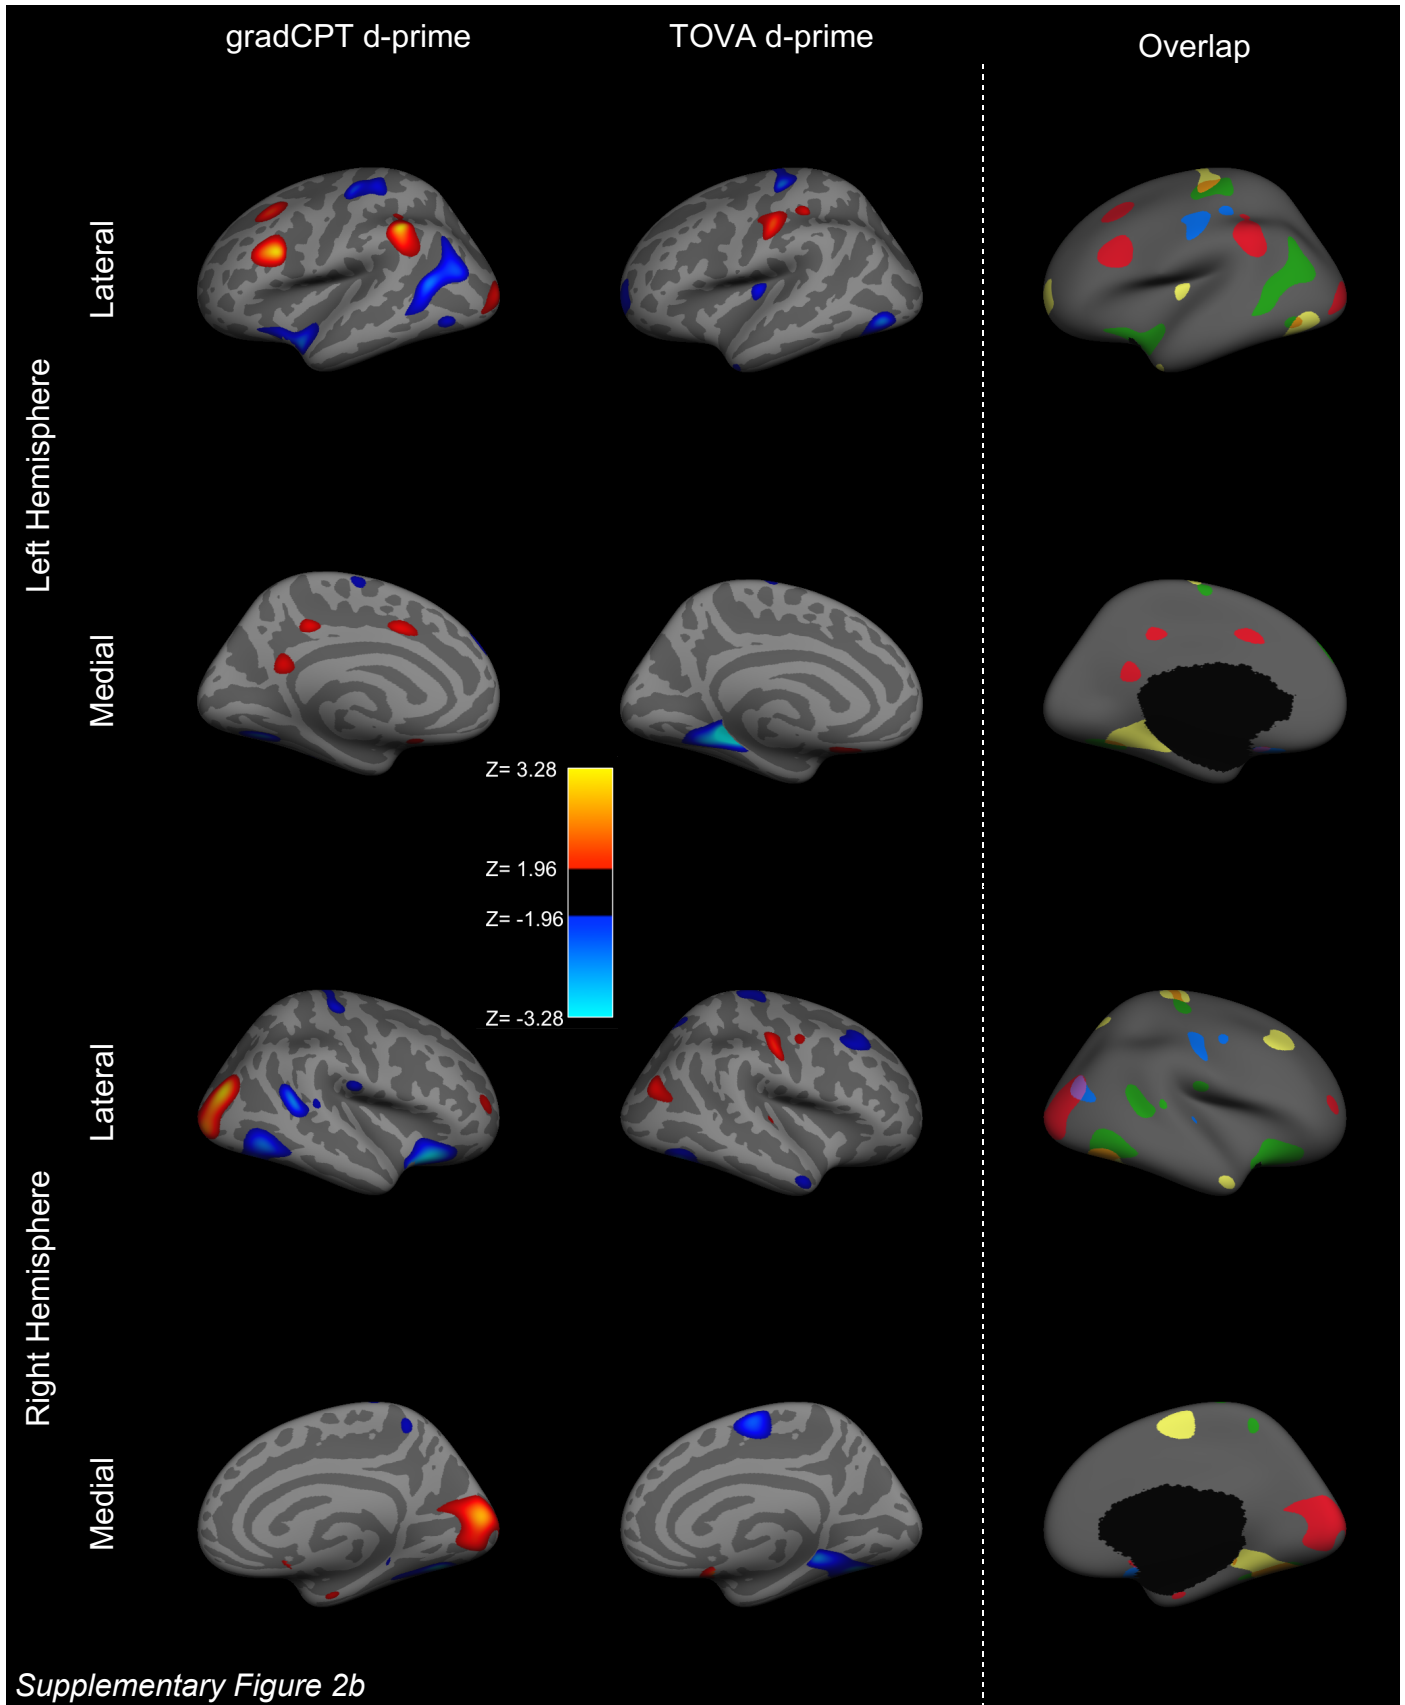

Supplementary Figure 2b

*Supplementary Figure 2a and 2b.* Whole brain vertex-wise analysis of the association between cortical volume (Figure 2a) or surface area (Figure 2b) and sustained attention ability, as measured by accuracy (d-prime) on the gradCPT and TOVA. Left and middle panel: Warm colors indicate positive correlations ( $p < .05$ ), cold colors indicate negative correlations ( $p < .05$ ). A green outline indicates a region that survives cluster correction ( $p < .05$ ). Right panel: The overlap (purple) between the significant positively correlated regions (nominal  $p < .05$ ) of gradCPT (red = positive) and the TOVA (blue = positive). The overlap (orange) between the significant negatively correlated regions (nominal  $p < .05$ ) of gradCPT (green = negative) and the TOVA (yellow = negative).
